# Supplementary figures and images for: NAIP–NLRC4-deficient mice are susceptible to shigellosis
Source: eLife journal article supplement (doi:10.7554/elife.59022), 2020-10-19

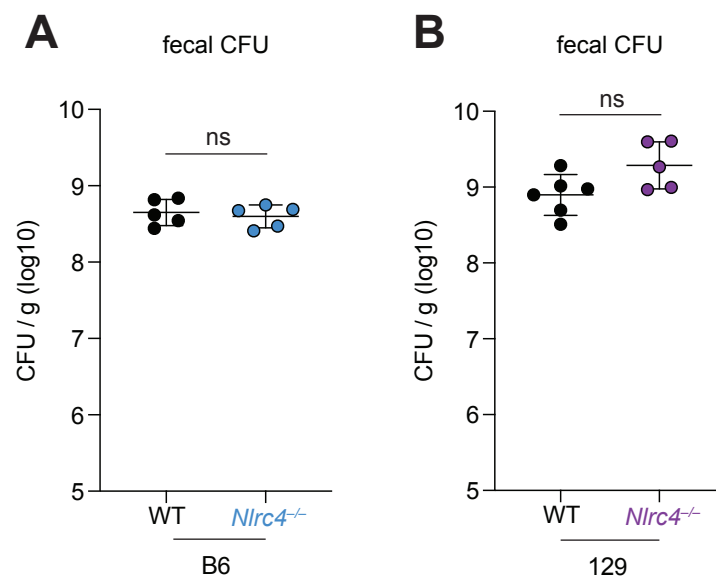

Figure 3-figure supplement 1

Supplement: supp [file elife-59022-supp-v1.zip]

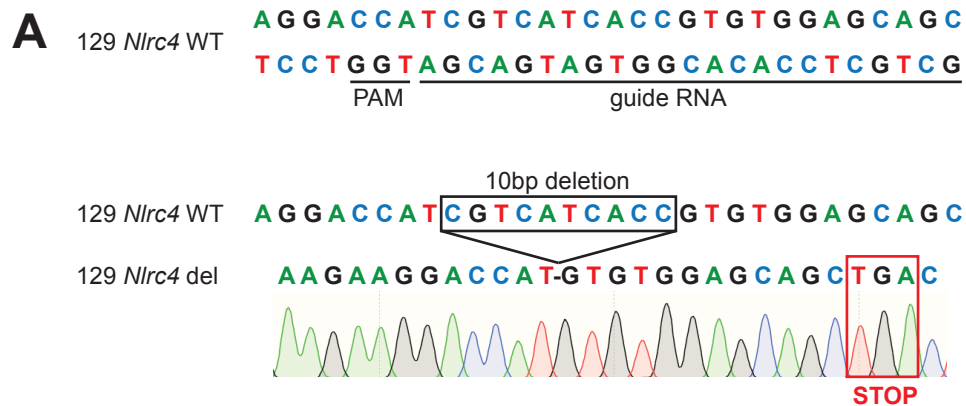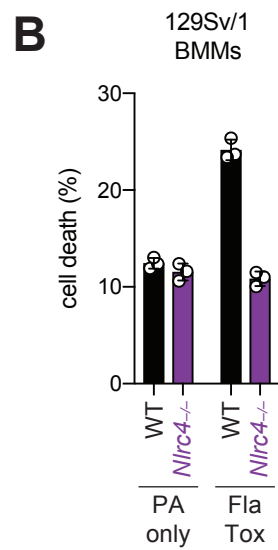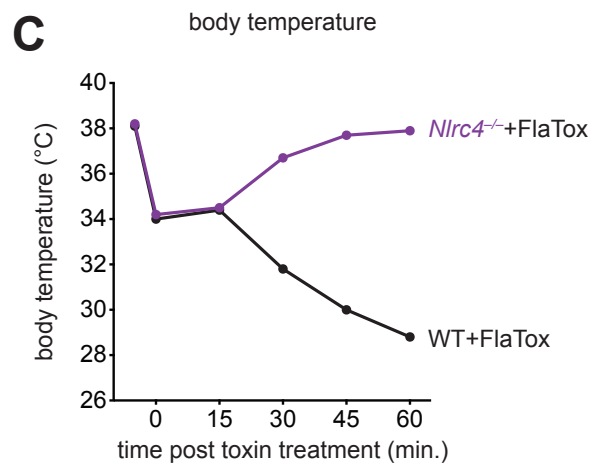

Figure 4–figure supplement 1

Supplement: supp [file elife-59022-supp-v1.zip]

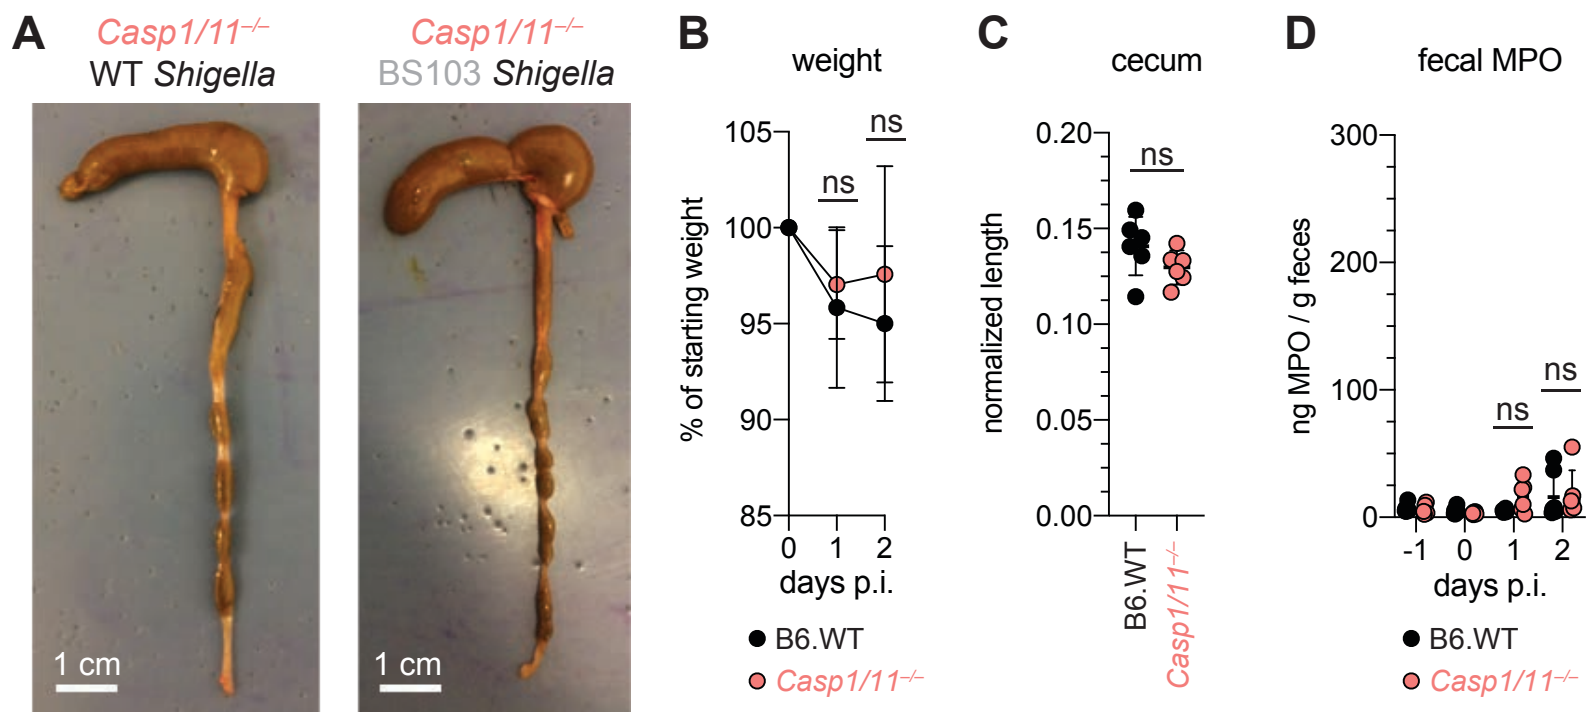

Figure 2–figure supplement 2

Supplement: supp [file elife-59022-supp-v1.zip]

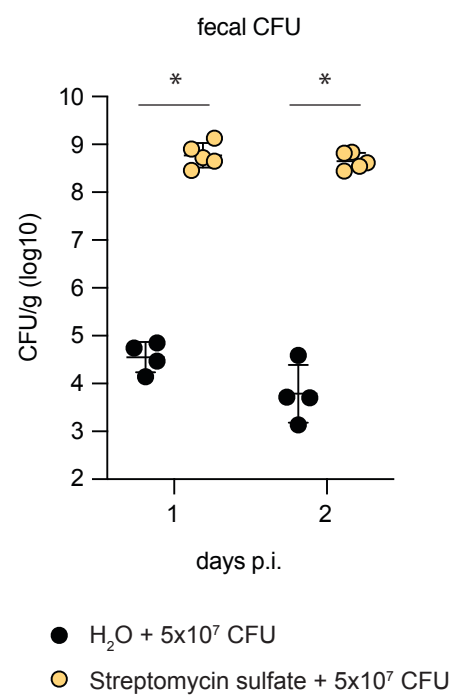

Figure 2–figure supplement 1

Supplement: supp [file elife-59022-supp-v1.zip]
